# Supplementary material for: In silico docking yields small molecule compounds targeting the core of Frizzled 7 as negative allosteric modulators
Source: Research Square preprint supplement (doi:10.21203/rs.3.rs-6908411/v2), 2025-08-15
Supplement: Supplementary file 2 [file fc13633a4c8ce4aedfe0c56f.pdf]

# In silico docking yields small molecule compounds targeting the core of Frizzled 7 as negative allosteric modulators

## Supplementary Information

Magdalena M. Scharf<sup>1</sup> Lukas Grätz<sup>1,†</sup> Julia Kinsolving<sup>1</sup> Jan Hendrik Voss<sup>1</sup>

David Carrasco-Busturia<sup>2</sup> Björn Forsberg<sup>3</sup> Peter Kolb<sup>4</sup> Gunnar Schulte<sup>1,\*</sup>

[1] Department of Physiology & Pharmacology, Sec Receptor Biology & Signaling, Biomedicum, S-171 65 Stockholm, Sweden

[2] Division of Theoretical Chemistry and Biology, School of Engineering Sciences in Chemistry, Biotechnology and Health, KTH Royal Institute of Technology, SE-100 44 Stockholm, Sweden

[3] Department of Physics, Chemistry and Biology, SciLifeLab, Linköping University, Linköping 58 183, Sweden

[4] Philipps-Universität Marburg, Institute of Pharmaceutical Chemistry, Marburg, Germany

†Current address: Molecular, Cellular and Pharmacobiology Section, Institute of Pharmaceutical Biology, University of Bonn, 53115 Bonn, Germany

\*To whom correspondence should be addressed: [gunnar.schulte@ki.se](mailto:gunnar.schulte@ki.se)

## Supplementary Figures

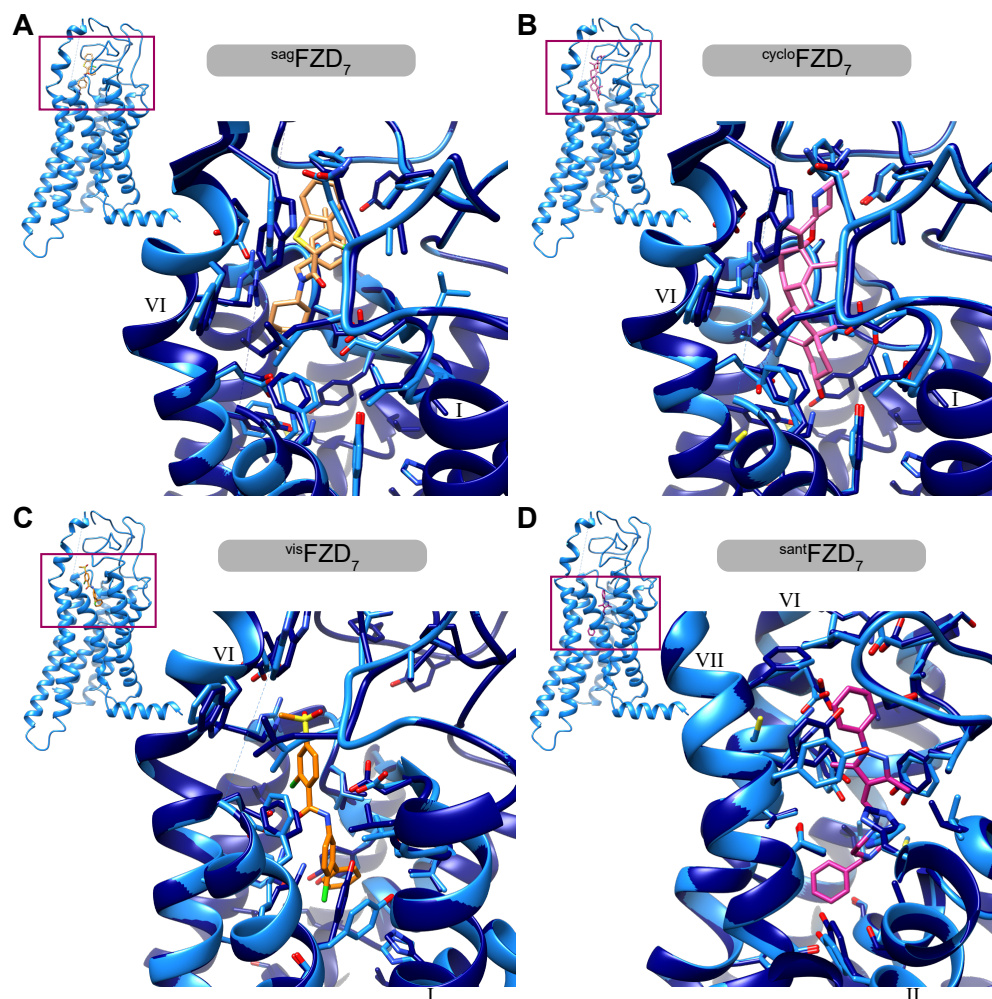

Figure S1: Overview of the prepared docking setups for the initial screen. A: <sup>sag</sup>FZD<sub>7</sub>, B: <sup>cyclo</sup>FZD<sub>7</sub>, C: <sup>sant</sup>FZD<sub>7</sub>, D: <sup>vis</sup>FZD<sub>7</sub>. Ligands from SMO structures were merged into the FZD<sub>7</sub> structure after alignment. The molecules and residues in 5 Å distance around the molecule were then energy minimised to adapt the artificial binding pocket to binding of a ligand. The side-view of the receptor shows the approximate location of molecule/binding pocket in the 7TMD. Close-up show the comparison of the residues in 5 Å distance around the inserted molecule in the original structure 7EVW (dark blue) and after minimising together with the inserted molecule (dodger blue). The respective inserted molecule is highlighted in a different colour (sand: SAG1.5; pink: cyclopamine; orange: vismodegib; violet red: SANT-1). Numbering of the TMs is indicated in roman numerals.

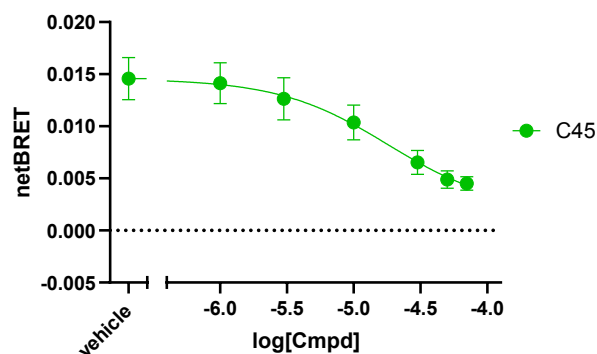

Figure S2: Concentration response curve from BRET-based competition binding experiments with C45 and BODIPY-cyclopamine (Nluc-FZD<sub>7</sub>). Datapoints are mean  $\pm$  SEM of 5 independent experiments.

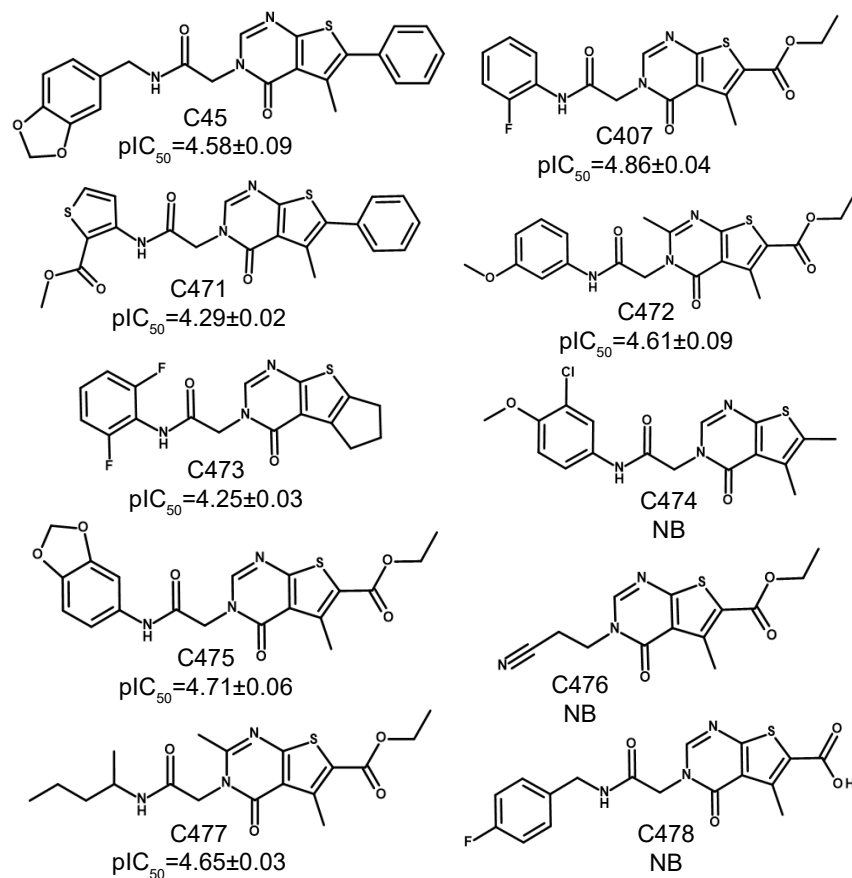

Figure S3: Chemical structures and  $\text{pIC}_{50}$  values from competition binding experiments for hit molecules C45 and C407 as well as all compounds based on C407 (C471-C478).  $\text{pIC}_{50}$  are mean  $\pm$  SEM for 3-5 independent experiments. NB: Not binding.

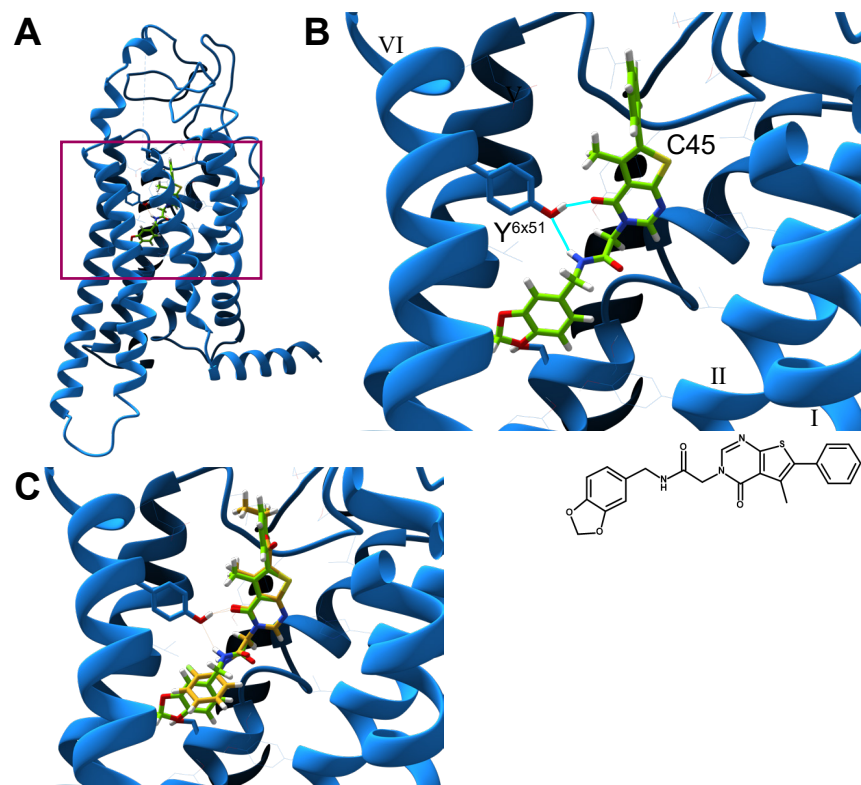

Figure S4: Predicted binding pose of C45 from the docking calculations. A: Side view of the receptor. C45 (bright green) is predicted to bind deep within the 7TMD of FZD<sub>7</sub> (blue), as highlighted by the purple frame. B: Closeup of the predicted binding pose of C45 (bright green) within the receptor core. Compound C45 is predicted to form polar interactions with Y489<sup>6x51</sup>, as indicated by bright blue lines. The chemical structure of C45 is depicted beneath the docking pose for reference. Numbering of the TMs is indicated in roman numerals. C: Overlay of the predicted binding poses of C45 (bright green) and C407 (goldenrod). Both compounds are predicted to bind in a similar pose. B,C: Note that TMs in the front are hidden for better visibility of the compound pose.



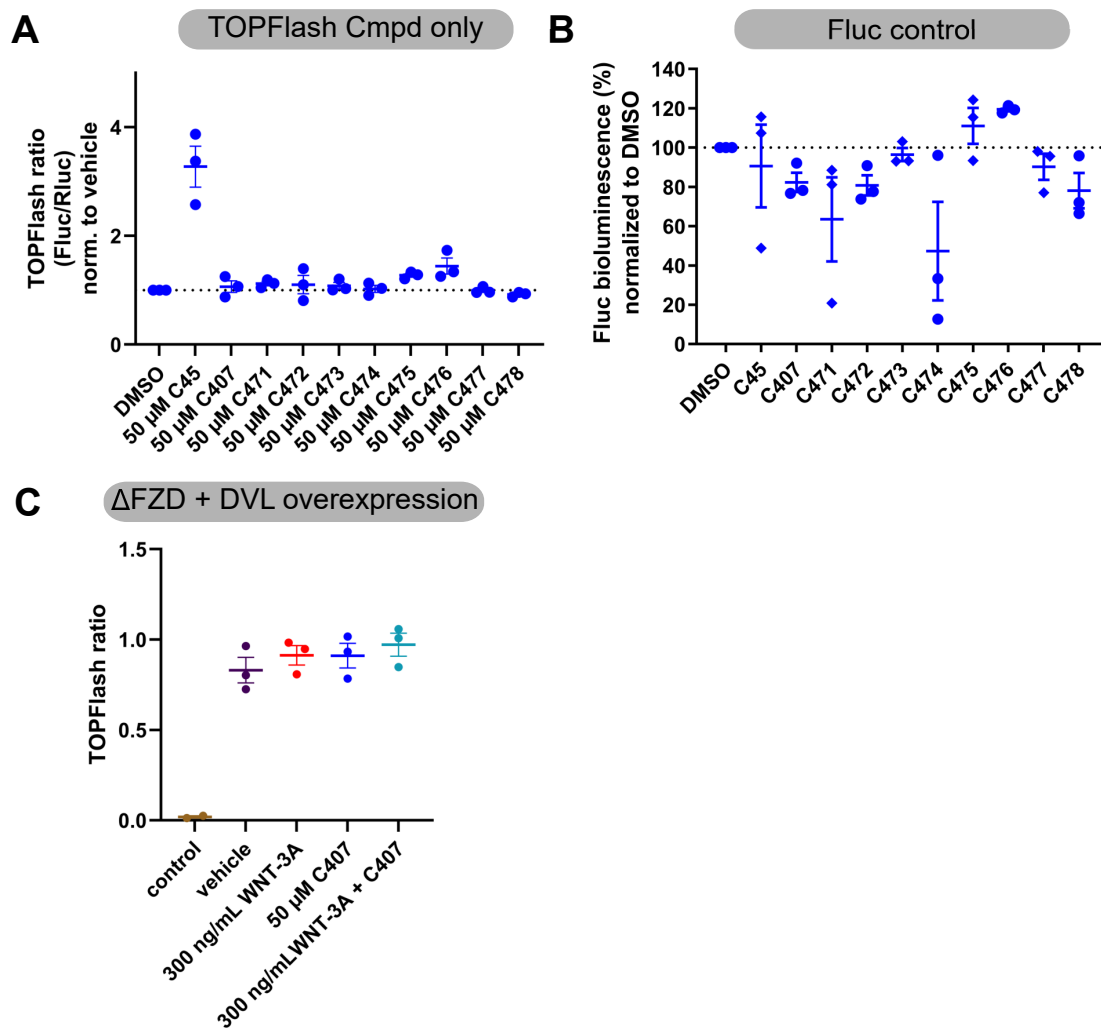

Figure S5: Control experiments for the TOPFlash assay. A: TOPFlash responses induced by the compounds alone at HiBiT-FZD<sub>7</sub>, which was transfected into  $\Delta$ FZD<sub>1-10</sub> HEK293T cells (no WNT stimulation) B: Control assay to exclude compound-mediated interference with Fluc bioluminescence. Experiments were performed in  $\Delta$ FZD<sub>1-10</sub> HEK293T cells constitutively expressing Fluc. C: Effect of WNT-3A and C407 stimulation on TOPFlash response induced by overexpression of DVL2 in  $\Delta$ FZD<sub>1-10</sub> HEK293T cells. Data points represent means  $\pm$  SEM of three independent measurements.

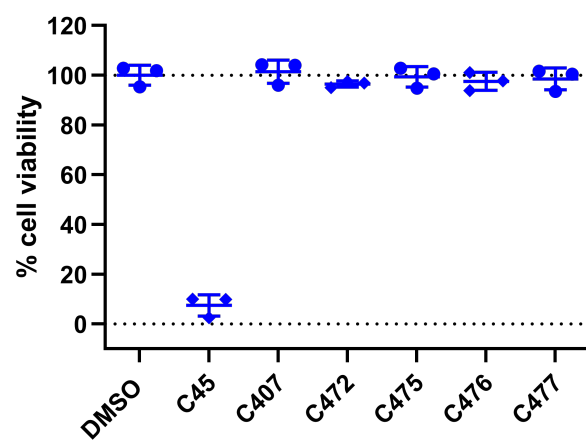

Figure S6: Effect of selected compounds on cell viability of HEK293 cells. Cells were incubated with 10  $\mu$ M of compound. Data points represent means  $\pm$  SD of 3 independent measurements.

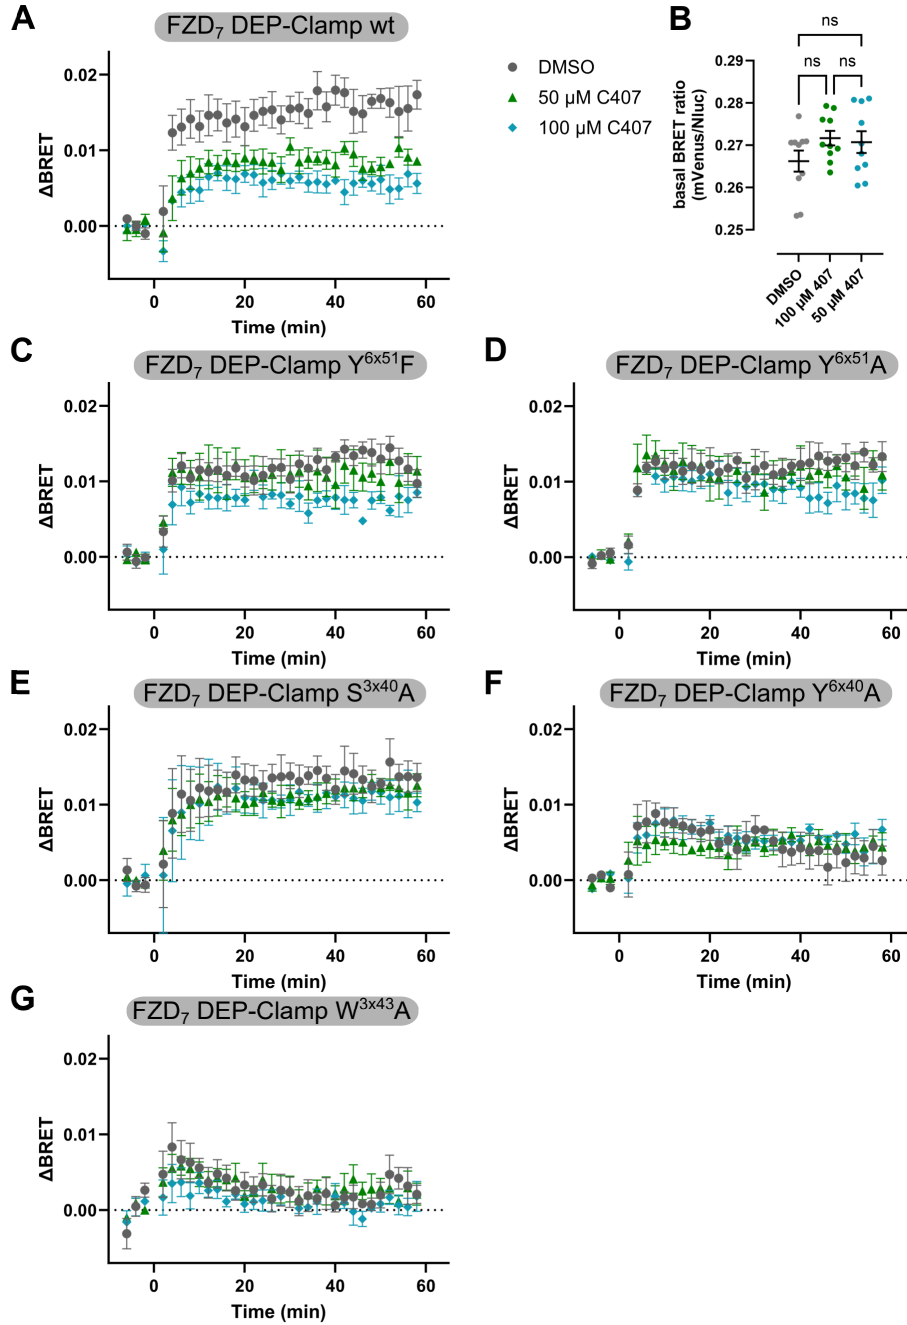

Figure S7: Measurements of BRET changes in the FZD<sub>7</sub>-DEP-Clamp sensor. Time-course measurements upon stimulation with WNT-3A only (DMSO; grey circles) and WNT-3A stimulation after pre-incubation with C407 (50 μM, green triangles, or 100 μM, blue squares) are shown for A: wild-type FZD<sub>7</sub>; C: FZD<sub>7</sub> Y489<sup>6x51</sup>F; D: FZD<sub>7</sub> Y489<sup>6x51</sup>A; E: FZD<sub>7</sub> S351<sup>3x40</sup>A; F: FZD<sub>7</sub> Y478<sup>6x40</sup>A; and G: FZD<sub>7</sub> W354<sup>3x43</sup>A. In all cases, 1 μg/mL WNT-3A was used. Data represent mean ± SEM for 3-5 independent experiments. B: Basal BRET values for the wild-type FZD<sub>7</sub>-DEP-Clamp sensor after pre-incubation with DMSO or C407 only. Data are mean ± SEM from five independent experiments (technical replicates were averaged for each experiment).

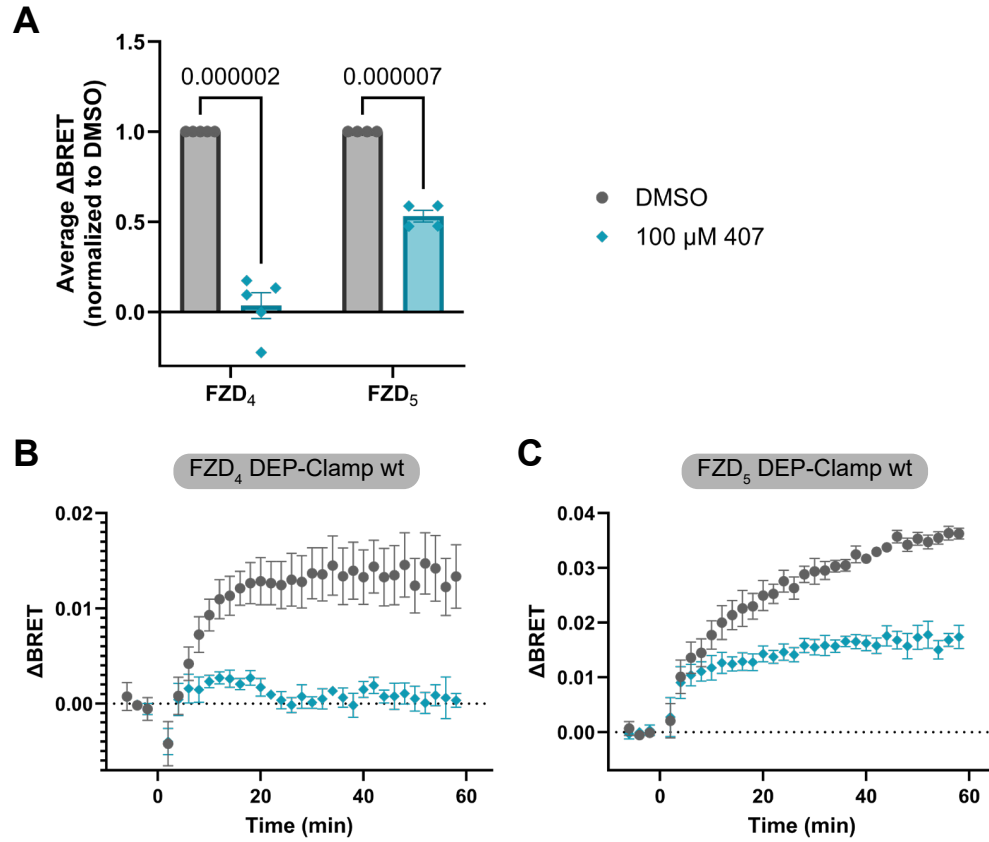

Figure S8: Selectivity measurements of C407 as determined using the FZD<sub>4</sub>- and FZD<sub>5</sub>-DEP-Clamp sensors. A: Bar charts showing the average BRET change after stimulation with WNT-3A (1  $\mu$ g/mL) after pre-incubation with DMSO (grey circles) or C407 (100  $\mu$ M, blue squares). B, C: Corresponding time-course measurements to A. Data are mean  $\pm$  SEM for 4-5 independent experiments. Statistical analysis was performed with a multiple unpaired t-test.

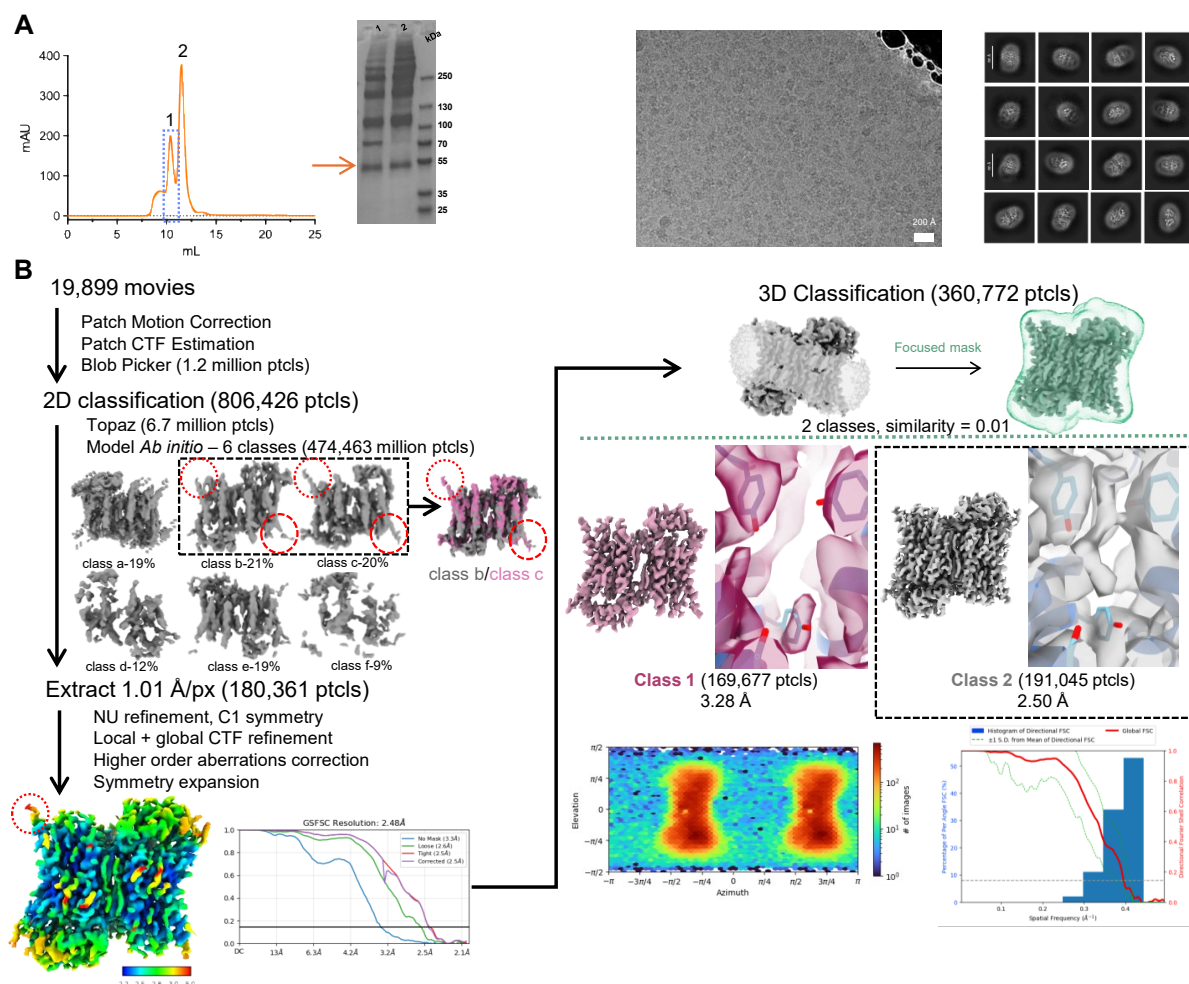

Figure S9: Biochemical characterization and processing pipeline of FZD<sub>7</sub>. A: Size exclusion chromatography (SEC) and Coomassie stain of purified FZD<sub>7</sub>. The dashed line represents the fraction taken for cryo-EM analysis. A representative micrograph and 2D classifications are taken from the collection. B: The cryo-EM workflow for data processing is detailed. Azimuth plot and FSC curve for the final map are shown. See materials and methods for more details.

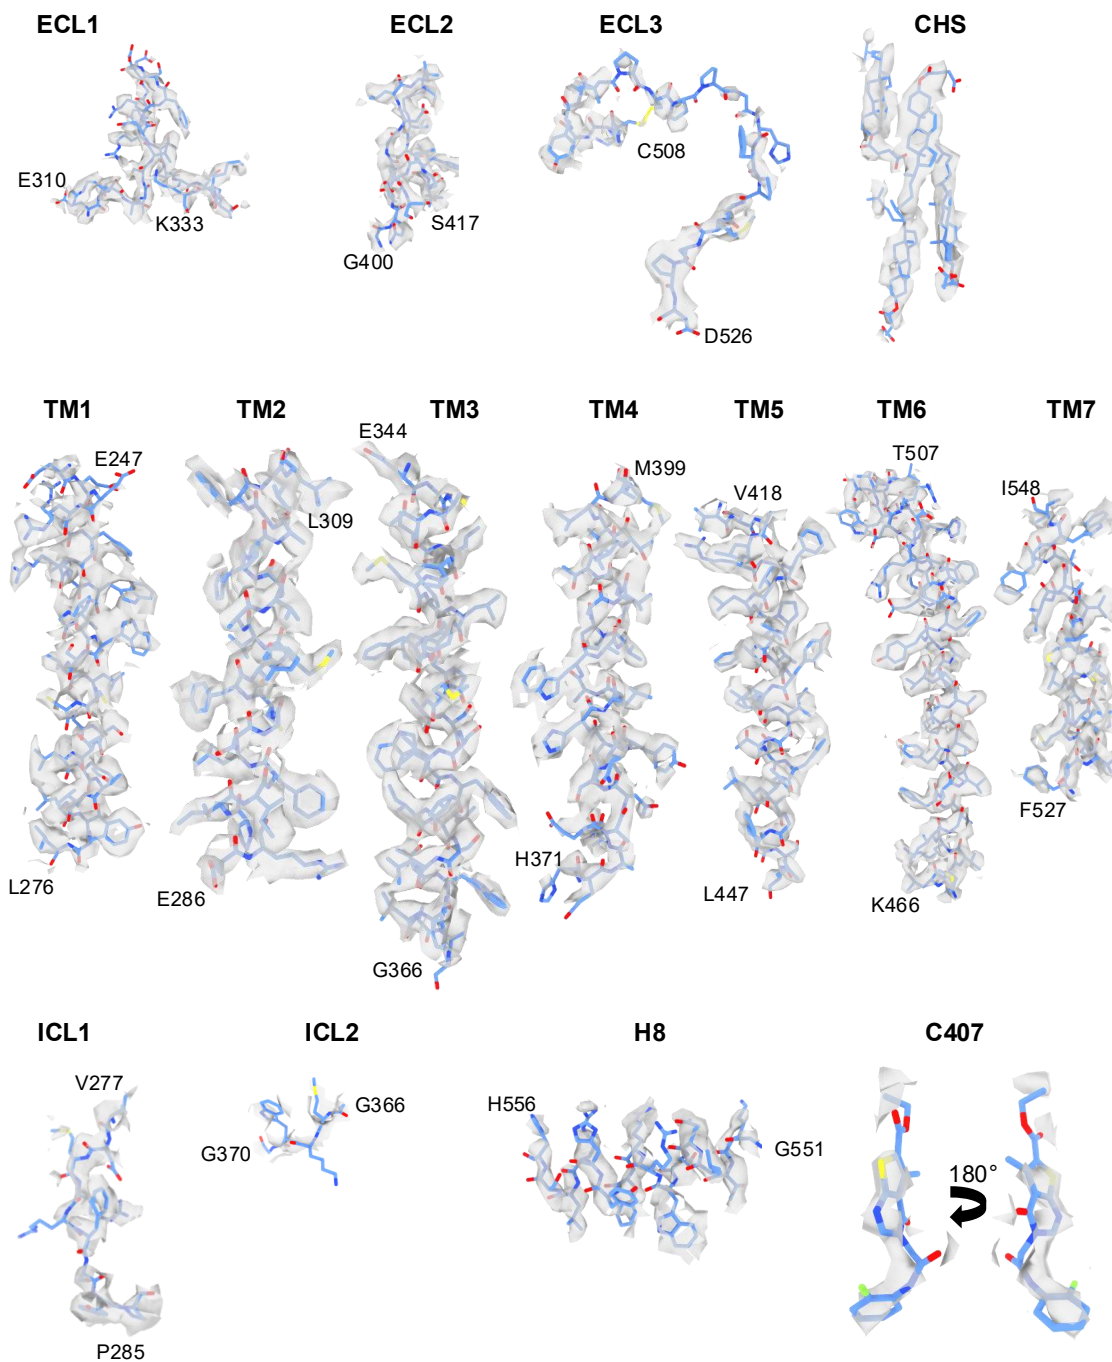

Figure S10: Cryo-EM maps with the model fit of FZD<sub>7</sub>. The density map of FZD<sub>7</sub> is shown with a surface representation (grey) and the contoured map as sticks (blue) for each respective domain, region, molecule or lipid.

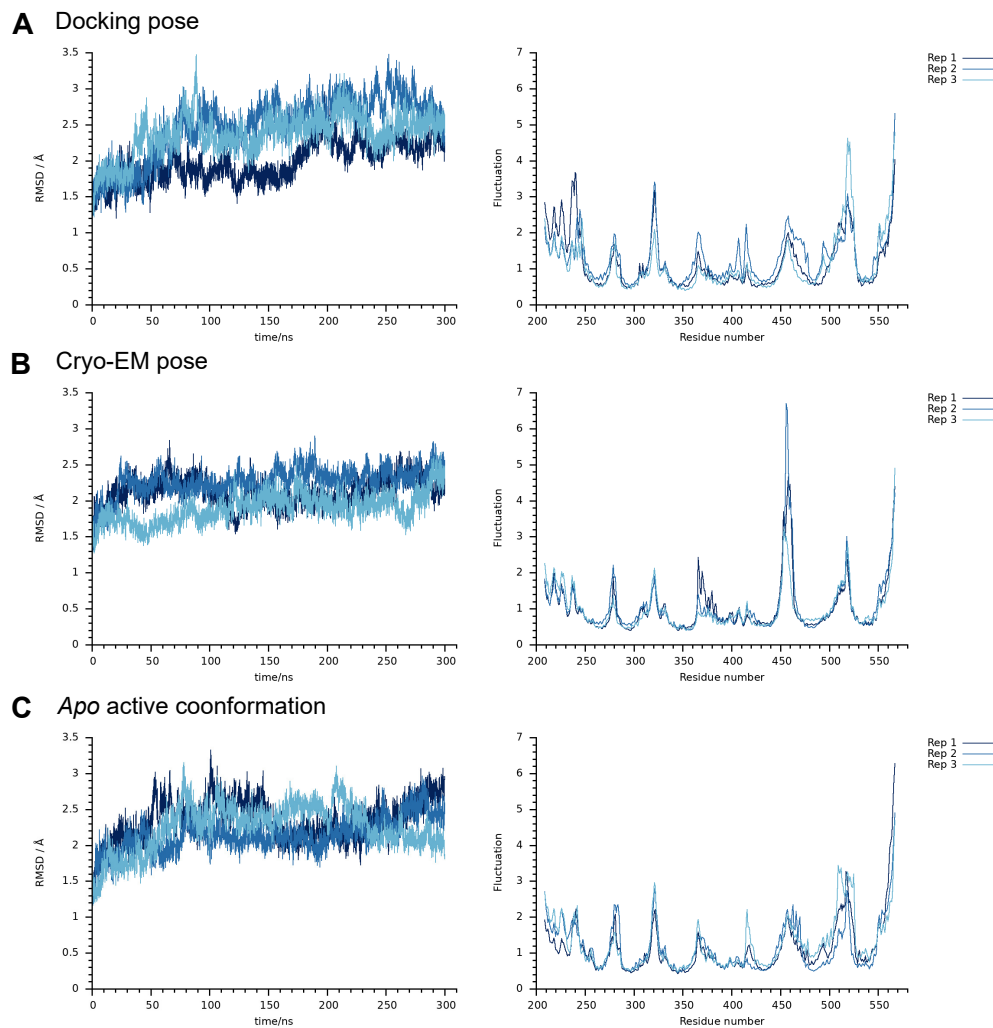

Figure S11: RMSD and RMSF of FZD<sub>7</sub> during the MD simulations. Left: Full backbone RMSD of the entire protein and calculated in reference to the initial starting model. Right: RMSF of the full backbone of the protein plotted per residue. A: Starting from the complex of C407 and FZD<sub>7</sub> based on the docking calculations. B: Starting from the complex of C407 and FZD<sub>7</sub> based on the cryo-EM data. C: Starting from the receptor in an *apo* active conformation as used for the docking calculations. Data for the three independent replica are shown in different shades of blue.



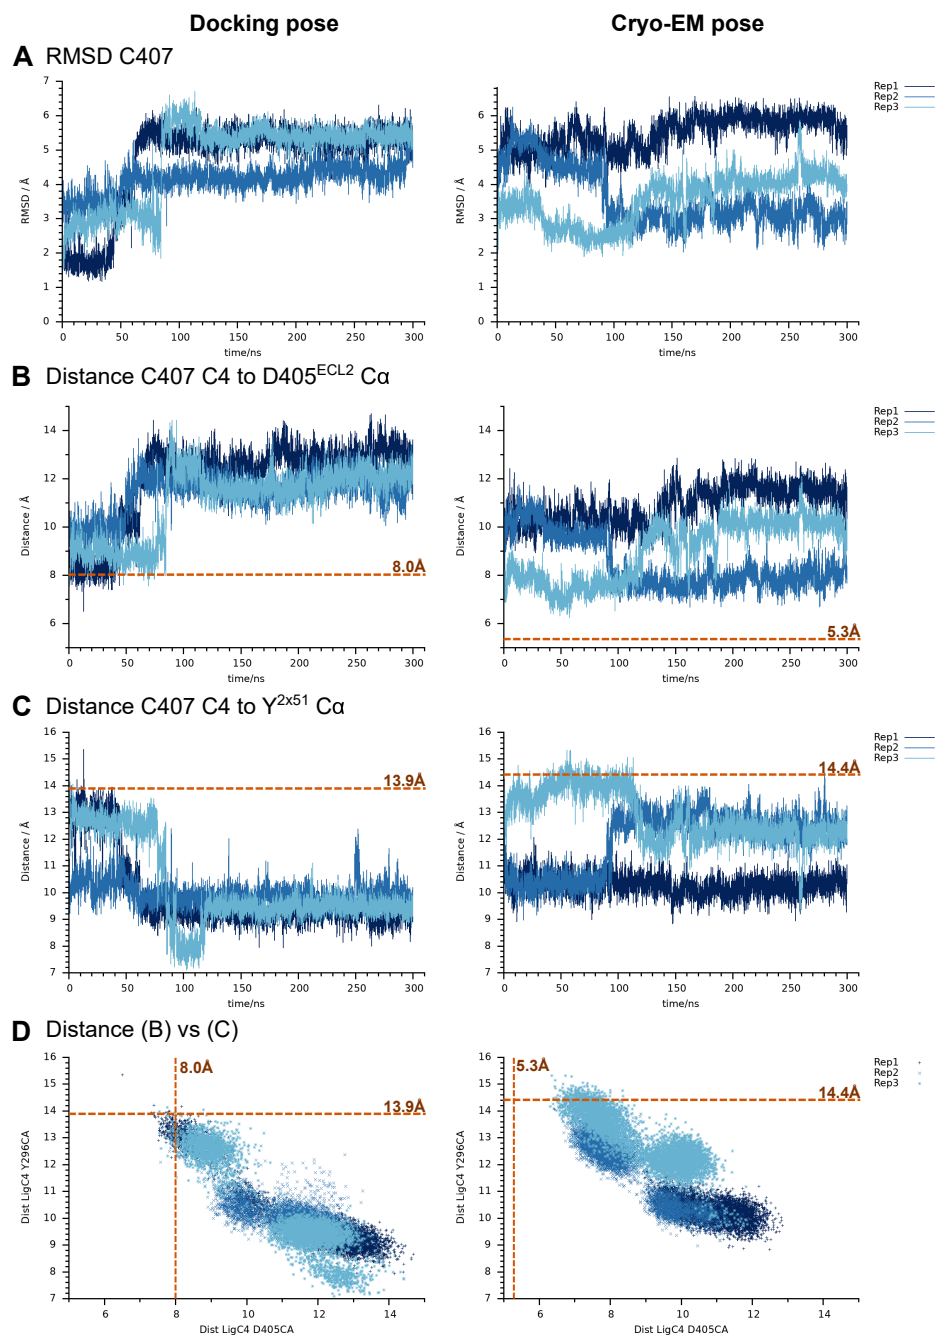

Figure S12: Movement of C407 throughout the trajectories. Left: Starting from the complex of C407 and FZD<sub>7</sub> based on the docking calculations. Right: Starting from the complex of C407 and FZD<sub>7</sub> based on the cryo-EM data. A: RMSD of C407 heavy atoms in reference to the initial starting pose. B: Distance between C407 'C4' and the D405<sup>ECL2</sup> Cα atom. C: Distance between C407 'C4' and the Y296<sup>2x51</sup> Cα atom. D: Distances from B and C plotted against each other. See Supplementary Figure S14 for details on atoms used for the distance measurements. Orange lines and numbers indicate respective distances in the initial starting model. Data for the three independent replica are shown in different shades of blue.

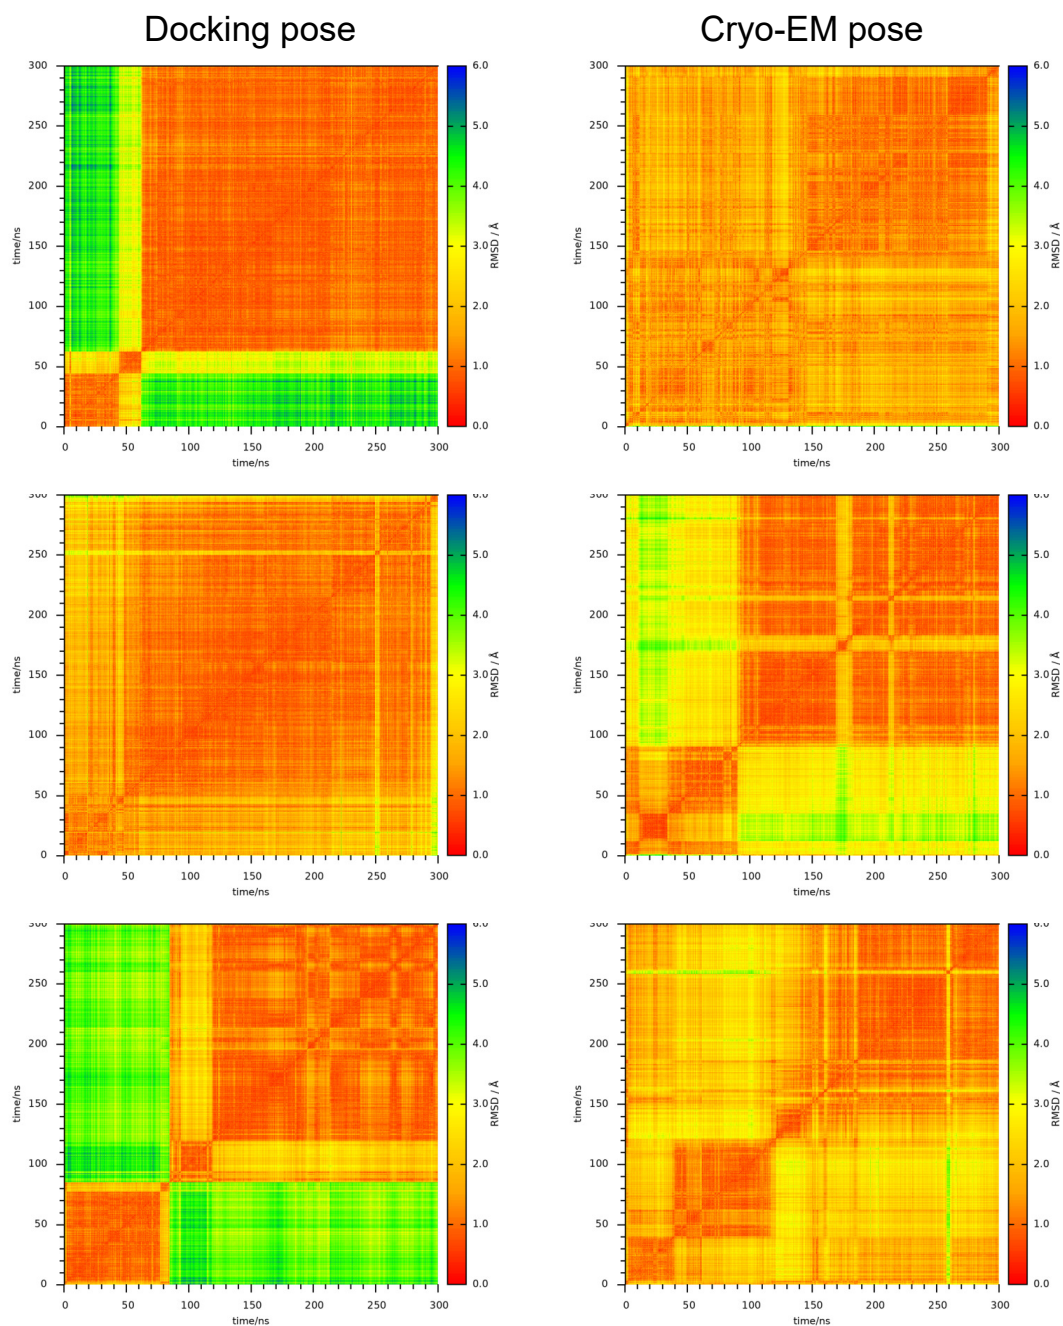

Figure S13: 2D-RMS plots of C407 throughout the trajectories. Left: Starting from the complex of C407 and FZD<sub>7</sub> based on the docking calculations. Right: Starting from the complex of C407 and FZD<sub>7</sub> based on the cryo-EM data. Each plot is for one of the three independent replica comparing each frame of the trajectory with each frame of the same trajectory.

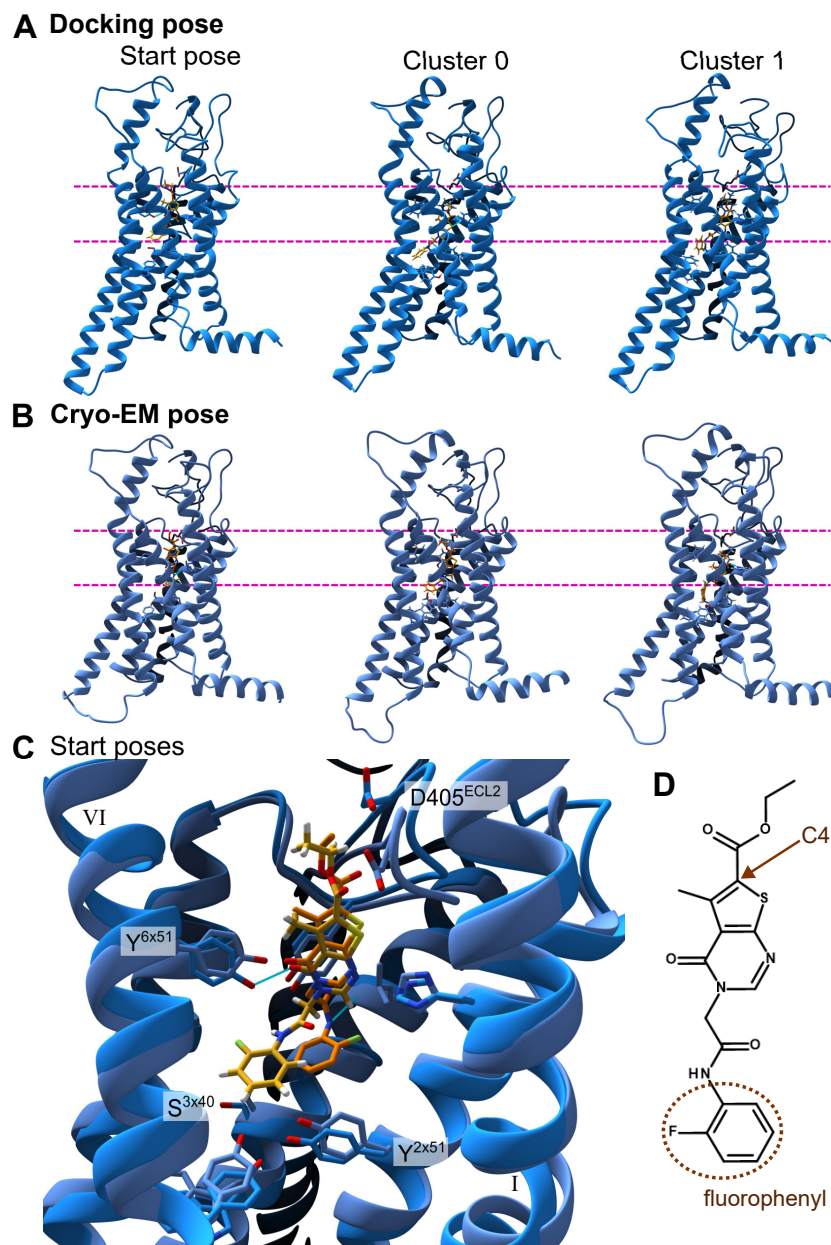

Figure S14: Movement of C407 within the 7TMD throughout the MD simulations and definition of atoms for distance measurements. A: Side-view of the 7TMD of FZD<sub>7</sub> for MD simulations starting from the docking pose of C407. Left: Starting pose. Middle: Representative frame of the most frequent pose of C407 during the MD simulation (51 % of frames). Right: Representative frame of the second most frequent pose of C407 (35 % of frames). Pink dashed lines indicate top and bottom reach of C407 within the 7TMD for the initial model. B: Same as A but for the MD simulations starting from the cryo-EM pose. Cluster 0 comprises 56 % of frames and cluster 1 30 %. C: Closeup view of the starting poses of C407 in both MD simulation setups. Residues that were used for distance measurements are indicated with their respective numbering. D: Chemical structure of C407 with moieties and atoms used for distance measurements indicated. Corresponding distance measurements to C and D can be found in Figure 4 and Supplementary Figures S12 and S16.

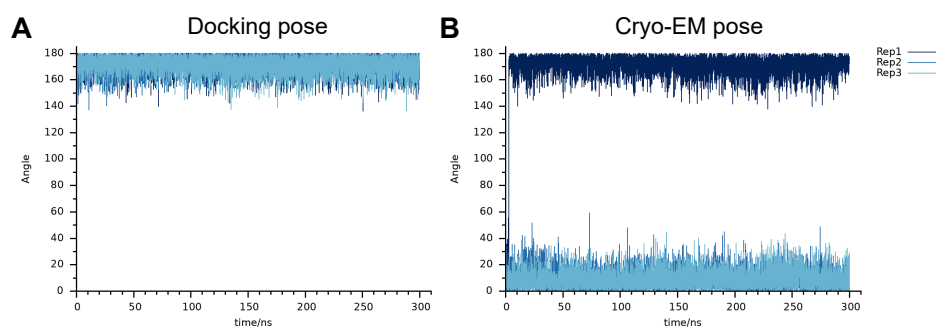

Figure S15: Dihedral angle of the amide in C407. A: Starting from the complex of C407 and FZD<sub>7</sub> based on the docking calculations. B: Starting from the complex of C407 and FZD<sub>7</sub> based on the cryo-EM data. Data of the three independent replica are shown in different shades of blue.

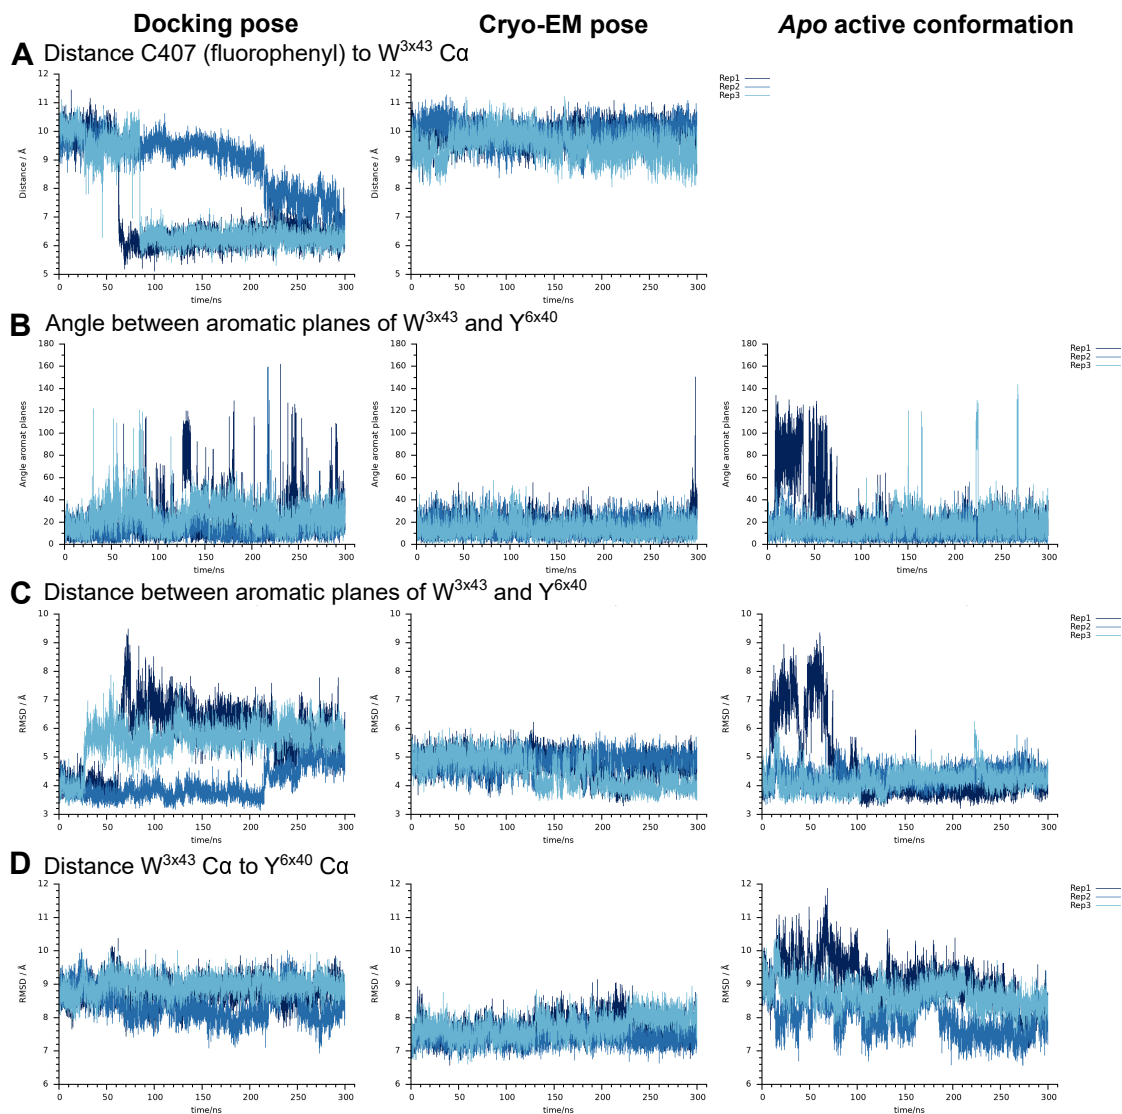

Figure S16: Interplay between the movement of C407 and extended molecular residues W354<sup>3x43</sup> and Y478<sup>6x40</sup>. Left: Starting from the complex of C407 and FZD<sub>7</sub> based on the docking calculations. Middle: Starting from the complex of C407 and FZD<sub>7</sub> based on the cryo-EM data. Right: Starting from the receptor in an *apo* active conformation as used for the docking calculations. A: Distance between the center of mass of the C407 fluorophenyl group (see Supplementary Figure S14) and W354<sup>3x43</sup> Cα. B: Angle between the vectors perpendicular to the aromatic planes of W354<sup>3x43</sup> and Y478<sup>6x40</sup>. C: Distance between the center of mass of the aromat rings of W354<sup>3x43</sup> and Y478<sup>6x40</sup>. D: Distance between Cα atoms of W354<sup>3x43</sup> and Y478<sup>6x40</sup>. Data for the three independent replica are shown in different shades of blue.



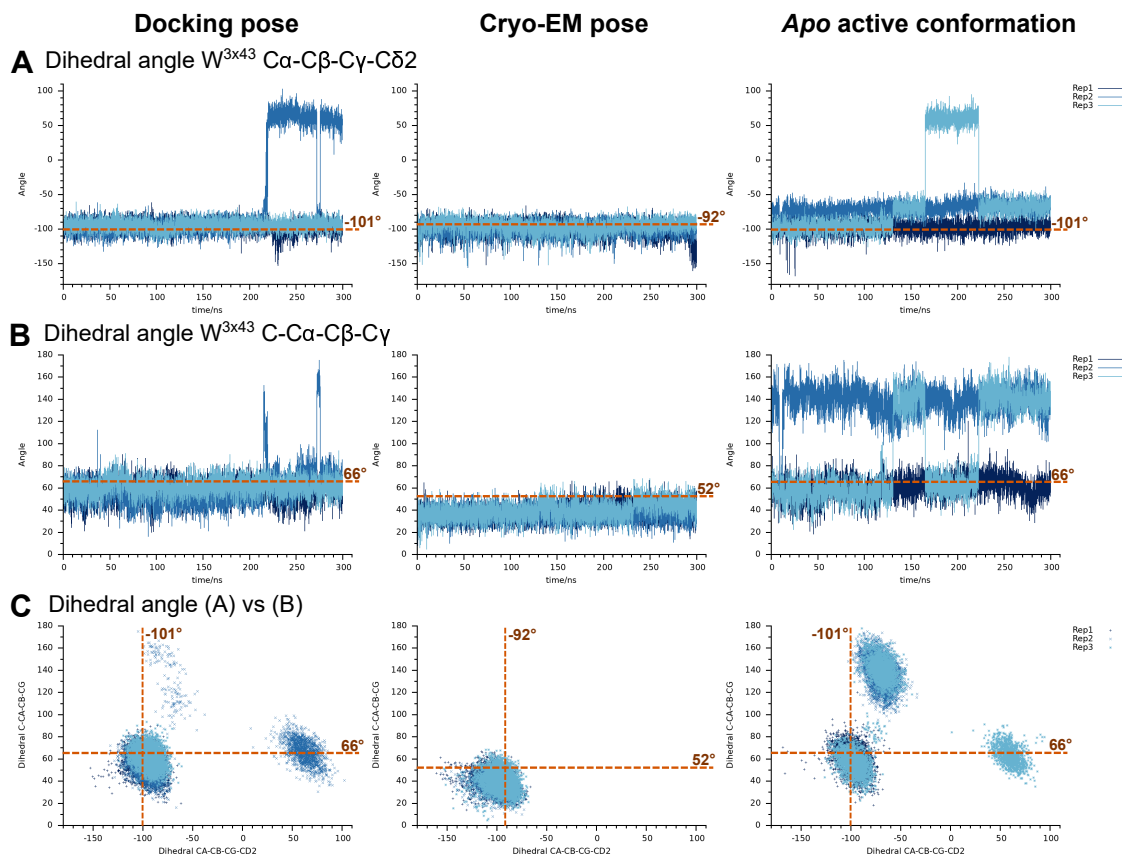

Figure S17: Dihedral angles of the side chain of W354<sup>3x43</sup>. Left: Starting from the complex of C407 and FZD<sub>7</sub> based on the docking calculations. Middle: Starting from the complex of C407 and FZD<sub>7</sub> based on the cryo-EM data. Right: Starting from the receptor in an *apo* active conformation as used for the docking calculations. A: Dihedral angle between Cα-Cβ-Cγ-Cδ2 atoms of W354<sup>3x43</sup>. B: Dihedral angle between C-Cα-Cβ-Cγ atoms of W354<sup>3x43</sup>. C: Dihedral angles from A and B plotted against each other. Orange lines and numbers indicate the respective dihedral angles in the initial starting model. Data of the three independent replica are shown in different shades of blue.

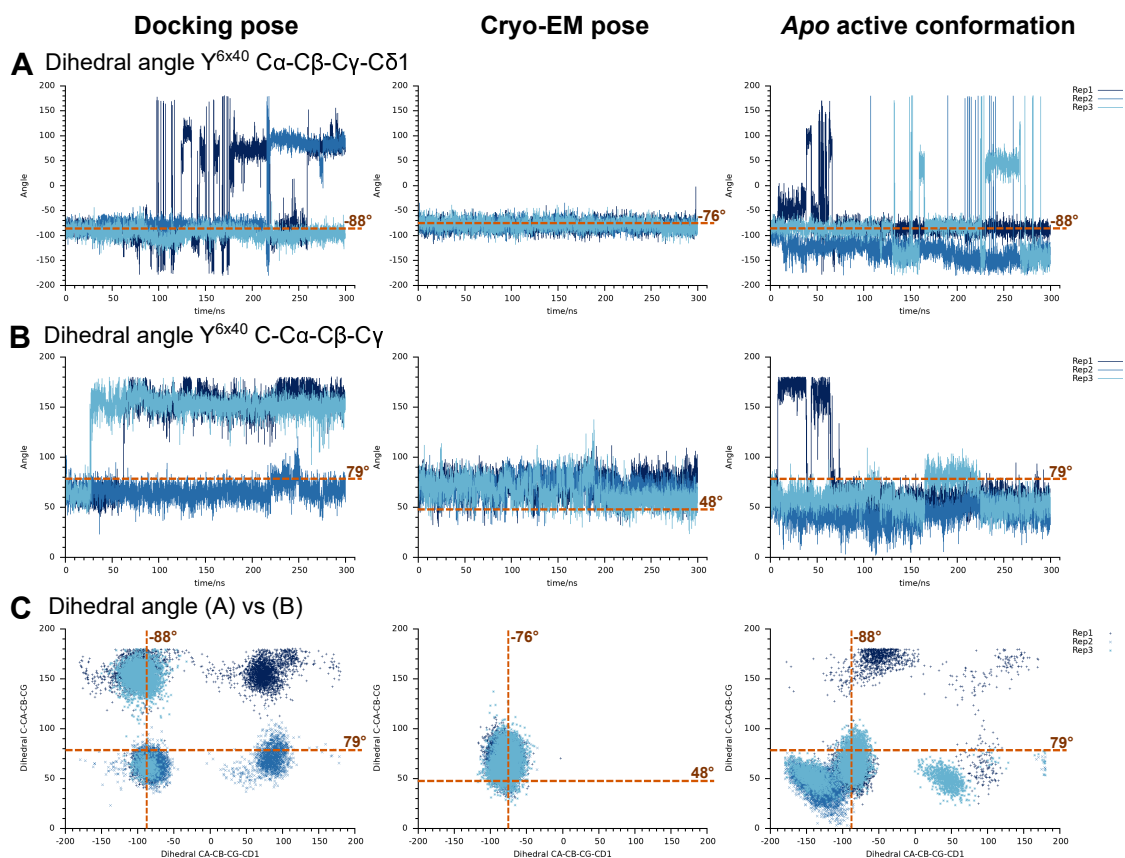

Figure S18: Dihedral angles of the side chain of  $Y478^{6x40}$ . Left: Starting from the complex of  $C407$  and  $FZD_7$  based on the docking calculations. Middle: Starting from the complex of  $C407$  and  $FZD_7$  based on the cryo-EM data. Right: Starting from the receptor in an *apo* active conformation as used for the docking calculations. A: Dihedral angle between  $C\alpha-C\beta-C\gamma-C\delta1$  atoms of  $Y478^{6x40}$ . B: Dihedral angle between  $C-C\alpha-C\beta-C\gamma$  atoms of  $Y478^{6x40}$ . C: Dihedral angles from A and B plotted against each other. Orange lines and numbers indicate the respective dihedral angles in the initial starting model. Data of the three independent replica are shown in different shades of blue.



## Supplementary Tables

Table S1. Cryo-EM data collection, refinement, and validation statistics.

| EMDB-53969/ PDB: 9RHG                         |           |
|-----------------------------------------------|-----------|
| <b>Data collection and processing</b>         |           |
| Magnification                                 | 165,000   |
| Voltage (kV)                                  | 300       |
| Defocus range ( $\mu\text{M}$ )               | -0.4 -1.8 |
| Pixel size ( $\text{\AA}$ )                   | 0.507     |
| Symmetry imposed                              | C1        |
| Initial particle images (no.)                 | 19,899    |
| Map resolution                                |           |
| FSC threshold                                 | 0.143     |
| Map local resolution range ( $\text{\AA}$ )   | 2.13-3.43 |
| <b>Refinement</b>                             |           |
| Initial models used                           | 9EPO      |
| Model resolution ( $\text{\AA}$ ) (FSC=0.143) | 1.9       |
| Map sharpening B factor ( $\text{\AA}^2$ )    | -30       |
| Model composition                             |           |
| Non-hydrogen atoms                            | 5767      |
| Number of protein residues/atoms              | 694       |
| Number of ligands/ligand atoms                | 5         |
| Average B factor ( $\text{\AA}^2$ )           |           |
| Protein                                       | 51.37     |
| Ligands                                       | 34.83     |
| R.m.s deviations                              |           |
| Bond lengths ( $\text{\AA}$ )                 | 0.003     |

Continuation of Table S1.

| EMDB-53969/ PDB: 9RHG |       |
|-----------------------|-------|
| Bond angles (°)       | 0.669 |
| Validation            |       |
| Molprobity score      | 1.35  |
| Clashscore            | 3.91  |
| Poor rotamers (%)     | 1.69  |
| Ramachandran plot     |       |
| Favored (%)           | 98.25 |
| Allowed (%)           | 1.75  |
| Disallowed (%)        | 0     |

EMD; electron microscopy bank, PDB; protein data bank, RMSD; root mean square deviation.

Table S2. System setup parameters for all included MD simulations.

|                                 | <i>apo</i> active | Docking pose  | Structure pose |
|---------------------------------|-------------------|---------------|----------------|
| Simulation box dimensions       | 85 x 85 x 120     | 85 x 85 x 120 | 85 x 85 x 120  |
| Total number of atoms           | 71288             | 71352         | 70425          |
| Number of water molecules       | 15198             | 15205         | 14852          |
| Salt concentration [mM]         | 150               | 150           | 150            |
| Lipid composition               |                   |               |                |
| Lipid type                      | POPC              | POPC          | POPC           |
| Number of lipids (Top layer)    | 75                | 75            | 75             |
| Number of lipids (Bottom layer) | 73                | 73            | 74             |
| Simulation length               |                   |               |                |
| Equilibration <i>NVT</i> [ns]   | 0.25              | 0.25          | 0.25           |
| Equilibration <i>NPT</i> [ns]   | 16.75             | 16.75         | 16.75          |
| Production runs [ns]            | 300               | 300           | 300            |
| Number of replica               | 3                 | 3             | 3              |

Table S3. Vendor and compound identifiers for all tested compounds as well as compound purities as provided by vendor quality control data. The hit molecules identified in pharmacological assays are highlighted in grey.

| ID   | ZINC ID          | MolPort ID          | Vendor ID   | Vendor       | purity      |
|------|------------------|---------------------|-------------|--------------|-------------|
| C11  | ZINC000006069641 |                     | sc-210120B  | SantaCruz    | $\geq 95\%$ |
| C12  | ZINC000065408474 | MolPort-047-489-699 | 53943877    | ChemBridge   | 100%        |
| C13  | ZINC000072126504 | MolPort-047-494-752 | 16054903    | ChemBridge   | 93%         |
| C14  | ZINC000072419084 | MolPort-047-495-109 | 34193291    | ChemBridge   | 97%         |
| C15  | ZINC000077321841 | MolPort-047-497-053 | 23318776    | ChemBridge   | 100%        |
| C16  | ZINC000163762760 |                     | Z1515110521 | Enamine      | 97%         |
| C17  | ZINC000328654785 |                     | Z1757898504 | Enamine      | 95%         |
| C21  | ZINC000006702107 | MolPort-000-832-620 | 9019362     | ChemBridge   | $\geq 85\%$ |
| C22  | ZINC000097604206 | MolPort-047-503-159 | 57305870    | ChemBridge   | 94%         |
| C31  | ZINC000000812166 |                     | Z46168873   | Enamine      | 100%        |
| C32  | ZINC000067805280 | MolPort-019-816-663 | 70332011    | ChemBridge   | 100%        |
| C33  | ZINC000067934644 | MolPort-019-821-985 | 87464791    | ChemBridge   | 95%         |
| C34  | ZINC000072898705 |                     | Z1301343910 | Enamine      | 96%         |
| C35  | ZINC000095421423 |                     | Z1439375842 | Enamine      | 98%         |
| C36  | ZINC000151702594 |                     | Z1458340850 | Enamine      | 100%        |
| C37  | ZINC000178964316 |                     | Z2242915358 | Enamine      | 100%        |
| C38  | ZINC000244787808 | MolPort-039-034-783 | 16750652    | ChemBridge   | 100%        |
| C41  | ZINC000000142135 | MolPort-000-662-104 | 6541524     | ChemBridge   | $\geq 85\%$ |
| C42  | ZINC000000618889 | MolPort-001-580-765 | STK149302   | Vitas-M      | $\geq 85\%$ |
| C43  | ZINC000005685988 | MolPort-001-558-552 | 7657461     | ChemBridge   | $\geq 85\%$ |
| C44  | ZINC000013127563 | MolPort-002-597-530 | STL221649   | Vitas-M      | $\geq 85\%$ |
| C45  | ZINC000014128943 |                     | Z88129578   | Enamine      | 89%         |
| C401 |                  |                     | CBK448805   | CBCS library | 98%         |

Continuation of Table S3.

| ID                | ZINC ID | MolPort ID | Vendor ID  | Vendor       | purity |
|-------------------|---------|------------|------------|--------------|--------|
| C402              |         |            | CBK413891  | CBCS library | 99%    |
| C403              |         |            | CBK249809  | CBCS library | 94%    |
| C404              |         |            | CBK071900  | CBCS library | 99%    |
| C405              |         |            | CBK268514  | CBCS library | 94%    |
| C406              |         |            | CBK072830  | CBCS library | 93%    |
| C407 <sup>a</sup> |         |            | CBK434718  | CBCS library | 98%    |
| C407              |         |            | Z25040997  | Enamine      | 100%   |
| C408              |         |            | CBK304562  | CBCS library | 85%    |
| C409              |         |            | CBK449777  | CBCS library | 98%    |
| C410              |         |            | CBK297102  | CBCS library | 55%    |
| C411              |         |            | CBK071910  | CBCS library | 99%    |
| C471              |         |            | Z202575498 | Enamine      | 94%    |
| C472              |         |            | Z94735417  | Enamine      | 98%    |
| C473              |         |            | Z87739603  | Enamine      | 94%    |
| C474              |         |            | Z26743350  | Enamine      | 94%    |
| C475              |         |            | Z25040877  | Enamine      | 94%    |
| C476              |         |            | Z54342035  | Enamine      | 100%   |
| C477              |         |            | Z94736991  | Enamine      | 97%    |
| C478              |         |            | Z107063344 | Enamine      | 93%    |

<sup>a</sup> C407 from this source was only used for initial binding experiments. All other experiments were conducted with C407 from Enamine.

Table S4. Compound SMILES for all tested compounds.

| ID   | SMILES                                                              |
|------|---------------------------------------------------------------------|
| C11  | <chem>Cc1cc(=O)oc2cc(OC(=O)c3ccc(N=C(N)N)cc3)ccc12</chem>           |
| C12  | <chem>O=C(N(Cc1ccc(F)cc1)Cc1cccn1)C12CNCC1CNC2</chem>               |
| C13  | <chem>CN(Cc1nc(-c2ccccc2)no1)C(=O)[C@H]1CC2(CCNCC2)CN1</chem>       |
| C14  | <chem>Cc1ccc(OCCNC[C@]2(O)CCCN2)cc1C</chem>                         |
| C15  | <chem>O[C@]1(CNCc2ccc(-n3cccn3)cc2)CNCCOC1</chem>                   |
| C16  | <chem>NCC[C@H]1CCCN(Cc2ccc(F)c(C(F)(F)F)c2)C1</chem>                |
| C17  | <chem>CN1CC[C@@H](CNCc2cccc3nccn23)[C@@H]1c1cccnc1</chem>           |
| C21  | <chem>BrC1ccc(OCc2ccccc2)c(CNCc2cccnc2)c1</chem>                    |
| C22  | <chem>NCC[C@H]1CN(Cc2ccc(Oc3ccccc3)cc2)CCO1</chem>                  |
| C31  | <chem>O=C(CN1CCCC1)Nc1ccc(Br)cc1</chem>                             |
| C32  | <chem>Cc1ccc(O)c(CN2CCC([C@]3(c4cccnc4)NC(=O)NC3=O)CC2)c1</chem>    |
| C33  | <chem>COc1ccc(Oc2nc(C)enc2C)cc1CN1CCCC1</chem>                      |
| C34  | <chem>Cc1ccc(NC(=O)CN2CCC3(CCOCC3)C2)cc1</chem>                     |
| C35  | <chem>O=C(Nc1ccc(CN[C@@H]2CCc3ccccc32)cc1)c1cccnc1</chem>           |
| C36  | <chem>O=C(CNC[C@H]1CCCO1)Nc1ccc(-c2csnn2)cc1</chem>                 |
| C37  | <chem>CNC[C@@H]1CCN(C(=O)[C@H]2COc3ccc(Cl)cc3C2)C1</chem>           |
| C38  | <chem>O=C(CN1CCC2(CC1)c1ccccc1C[C@H]2O)Nc1ccc(F)cc1</chem>          |
| C41  | <chem>Cc1ccc(N2C(=O)C(Cl)=C(Nc3cccc(O)c3)C2=O)c(C)c1</chem>         |
| C42  | <chem>CCOc1cccc(N2C(=O)C[C@H](n3cnc4ccccc43)C2=O)c1</chem>          |
| C43  | <chem>COC(=O)c1ccc(NC(=O)CSc2nc(CC(C)C)n[nH]2)cc1</chem>            |
| C44  | <chem>COc1ccc([C@@H]2C[C@H](c3ccc(C)cc3)Nc3nc(N)nn32)cc1</chem>     |
| C45  | <chem>Cc1c(-c2ccccc2)sc2ncn(CC(=O)NCc3ccc4c(c3)OCO4)c(=O)c12</chem> |
| C401 | <chem>s1c2ncn(c(=O)c2cc1c1ccccc1)CC(=O)OCCC</chem>                  |
| C402 | <chem>s1c2ncn(c(=O)c2c2c1CCCC2)CC(=O)NCc1ccccc1</chem>              |
| C403 | <chem>c12c(ncn(c1=O)CC(=O)NCCOc1cc(Cl)ccc1)sc(c2C)C</chem>          |

Continuation of Table S4.

| ID   | Smiles                                                               |
|------|----------------------------------------------------------------------|
| C404 | <chem>c12c(ncn(c1=O)CC(=O)NCc1ncccc1)sc(c2)C</chem>                  |
| C405 | <chem>c12c(sc(c1C)C(=O)N)ncn(c2=O)CC(=O)NCCc1cccc1</chem>            |
| C406 | <chem>n1(c(=O)c2c(nc1C)cccc2)CC(=O)NCc1cccc1</chem>                  |
| C407 | <chem>s1c2ncn(c(=O)c2c(c1C(=O)OCC)C)CC(=O)Nc1c(F)cccc1</chem>        |
| C408 | <chem>c12c(ncn(c1=O)CC(=O)NC1c3c(OCC1)cccc3)sc(c2C)C</chem>          |
| C409 | <chem>s1c2ncn(c(=O)c2c(c1C(=O)N)C)CC(=O)Nc1c(cccc1)CC</chem>         |
| C410 | <chem>c12c(ncn(c1=O)CC(=O)c1cc3c(OCO3)cc1)sc(c2)c1cccc1</chem>       |
| C411 | <chem>c12c(sc(c1C)C(=O)Nc1c(OC)cccc1)ncn(c2=O)CC(=O)NCCC</chem>      |
| C471 | <chem>Cc1c(-c2cccc2)sc(N=CN2CC(Nc3c(C(OC)=O)scc3)=O)c1C2=O</chem>    |
| C472 | <chem>CCOC(c1c(C)c(C(N(CC(Nc2cc(OC)ccc2)=O)C(C)=N2)=O)c2s1)=O</chem> |
| C473 | <chem>O=C(CN(C=Nc1c2c(CCC3)c3s1)C2=O)Nc(c(F)ccc1)c1F</chem>          |
| C474 | <chem>Cc1c(C)sc(N=CN2CC(Nc(cc3)cc(Cl)c3OC)=O)c1C2=O</chem>           |
| C475 | <chem>CCOC(c1c(C)c(C(N(CC(Nc(cc2)cc3c2OCO3)=O)C=N2)=O)c2s1)=O</chem> |
| C476 | <chem>CCOC(c1c(C)c(C(N(CCC#N)C=N2)=O)c2s1)=O</chem>                  |
| C477 | <chem>CCCC(C)NC(CN(C(C)=Nc1c2c(C)c(C(OCC)=O)s1)C2=O)=O</chem>        |
| C478 | <chem>Cc1c(C(O)=O)sc(N=CN2CC(NCc(cc3)ccc3F)=O)c1C2=O</chem>          |
